# Supplementary material for: One-step preparation of Pt/Ag nanoclusters for CO2 transformation
Source: Royal Society of Chemistry journal article supplement (doi:10.1039/d3cp02736h), 2023-01-01
Supplement: d3cp02736h1.pdf [file d3cp02736h1.pdf]

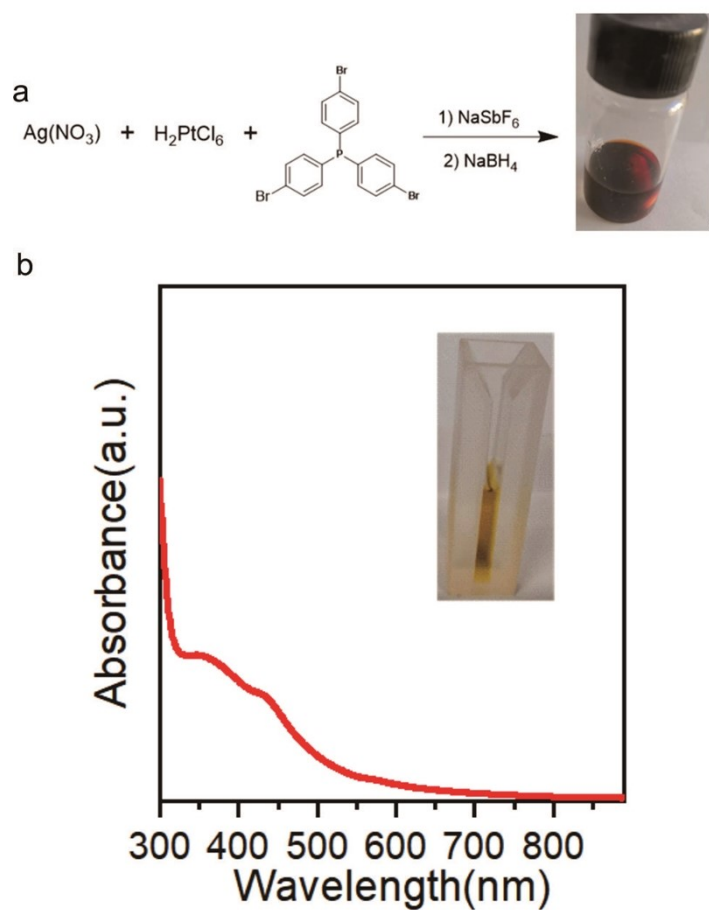

**Figure S1.** (a) Synthetic prototype and (b) characterization of raw product of  $\text{PtAg}_9$  clusters.

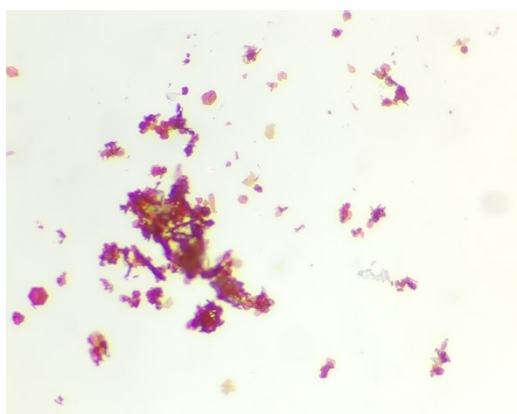

**Figure S2.** Photographs of single crystals of  $\text{PtAg}_9$  clusters.

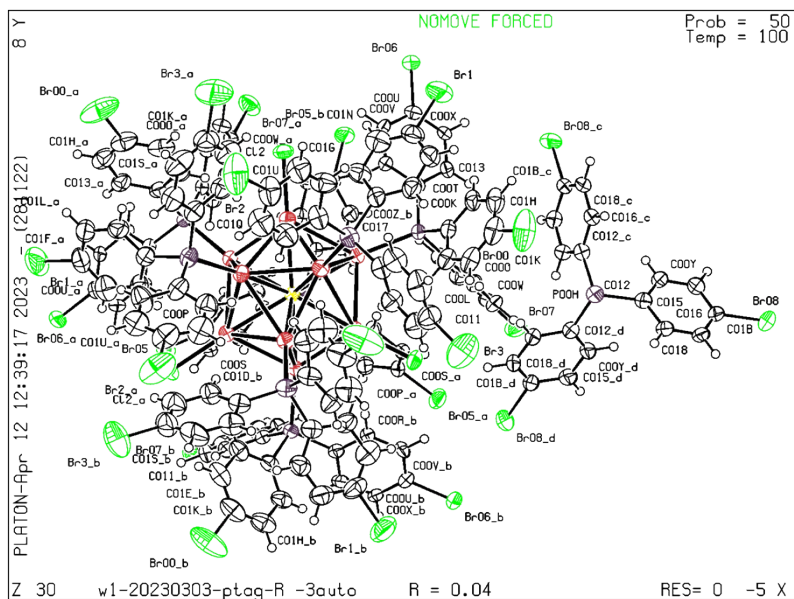

**Figure S3.** The thermal ellipsoids of the ORTEP diagram of PtAg<sub>9</sub> clusters at 50% probability.

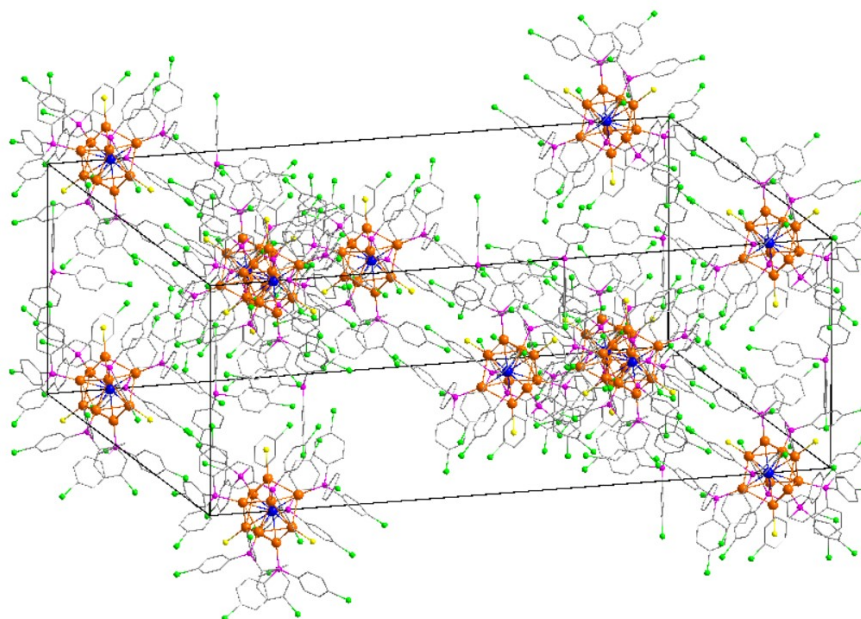

**Figure S4.** The packing structure of PtAg<sub>9</sub> clusters in their single crystals. Color legend: orange spheres, Ag; green spheres, Pt; pink spheres, P; yellow spheres, Cl; gray spheres, C; bright green spheres, Br. All hydrogen atoms are omitted for clarity.

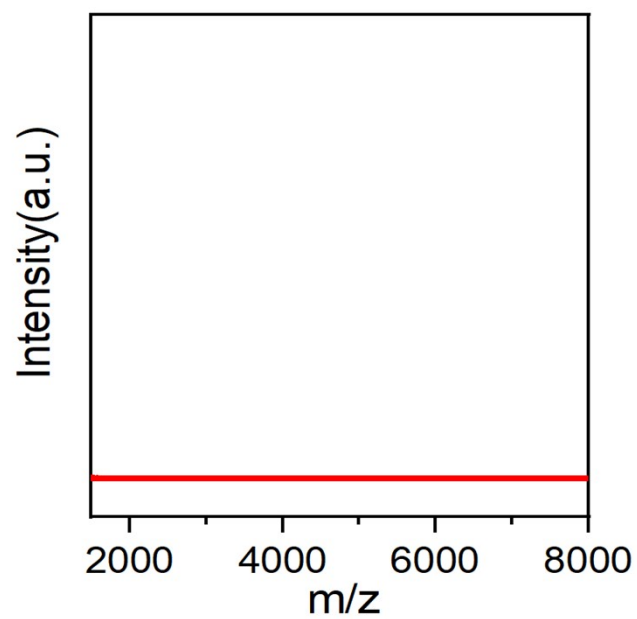

**Figure S5.** ESI-MS of PtAg<sub>9</sub> in the positive mode.

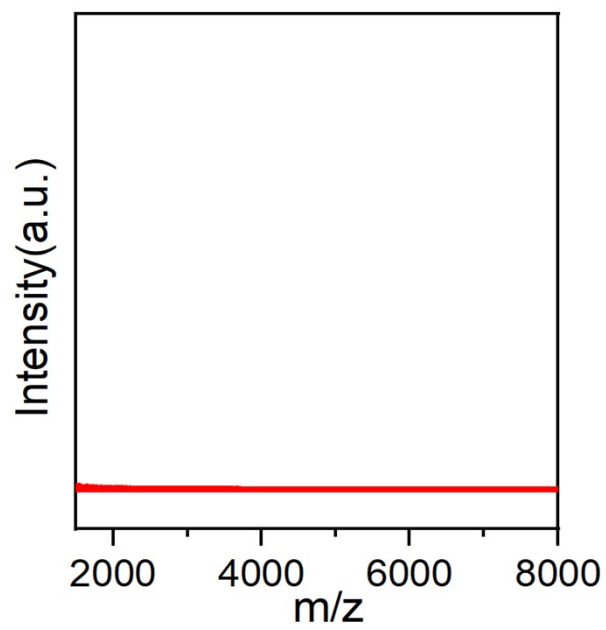

**Figure S6.** ESI-MS of PtAg<sub>9</sub> in the negative mode.

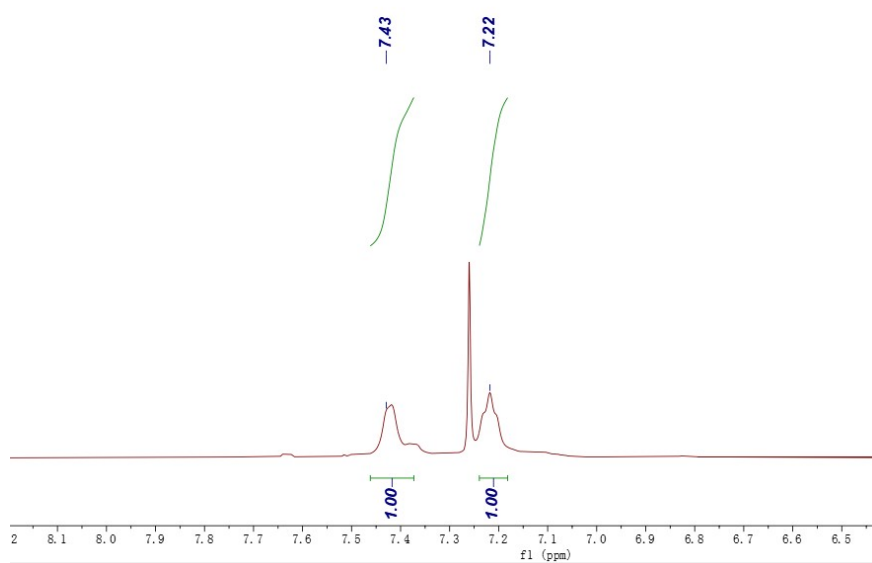

**Figure S7.**  $^1\text{H}$  NMR of  $\text{PtAg}_9$  in  $\text{CDCl}_3$ .

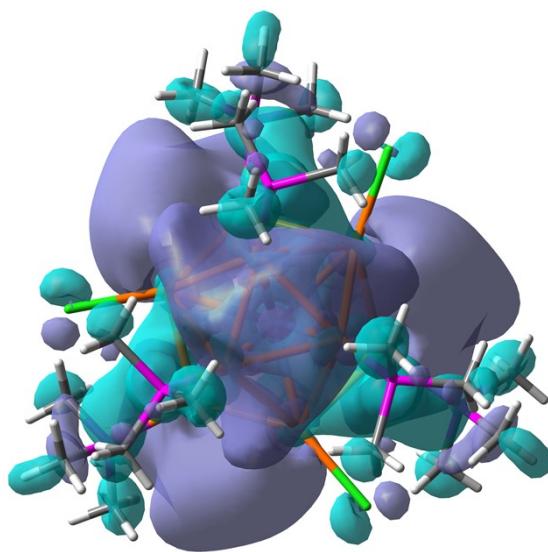

**Figure S8.** The electronic diagrams of LUMO+2 of  $\text{PtAg}_9$ .

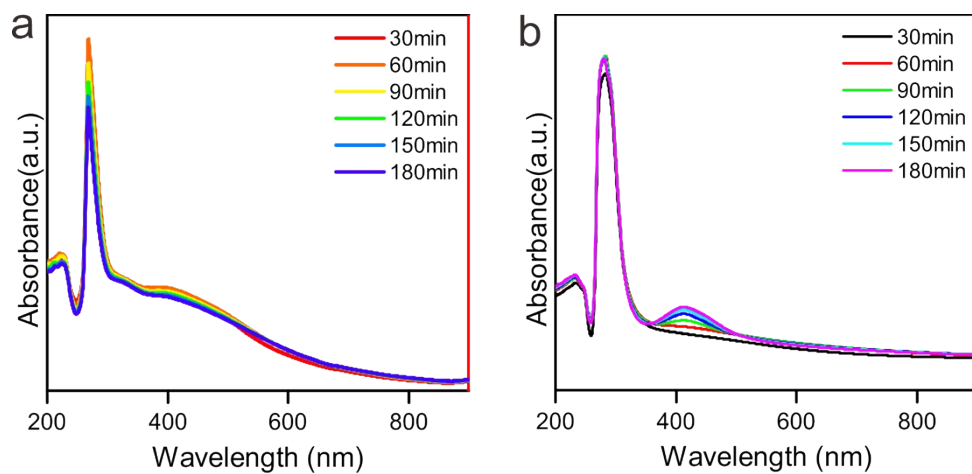

**Figure S9.** Time-dependent UV-Vis spectra of [PtAg<sub>9</sub>(C<sub>18</sub>H<sub>12</sub>Br<sub>3</sub>P)<sub>7</sub>Cl<sub>3</sub>](C<sub>18</sub>H<sub>12</sub>Br<sub>3</sub>P) (a) and the previously reported Pt<sub>1</sub>Ag<sub>9</sub>[P(Ph-F)<sub>3</sub>]<sub>7</sub>Cl<sub>3</sub> (b) under ambient atmosphere.

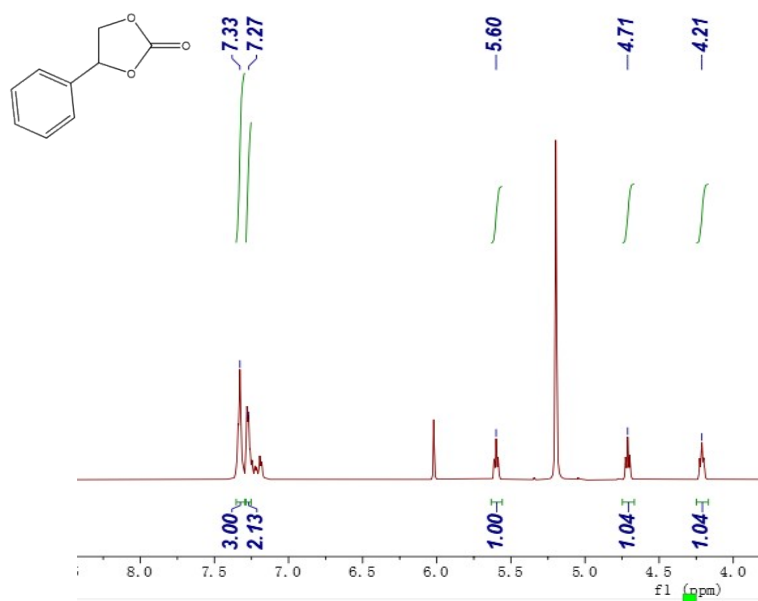

**Figure S10.** The <sup>1</sup>H NMR spectrum of 4-phenyl-1,3-dioxolan-2-one (CDCl<sub>3</sub>).

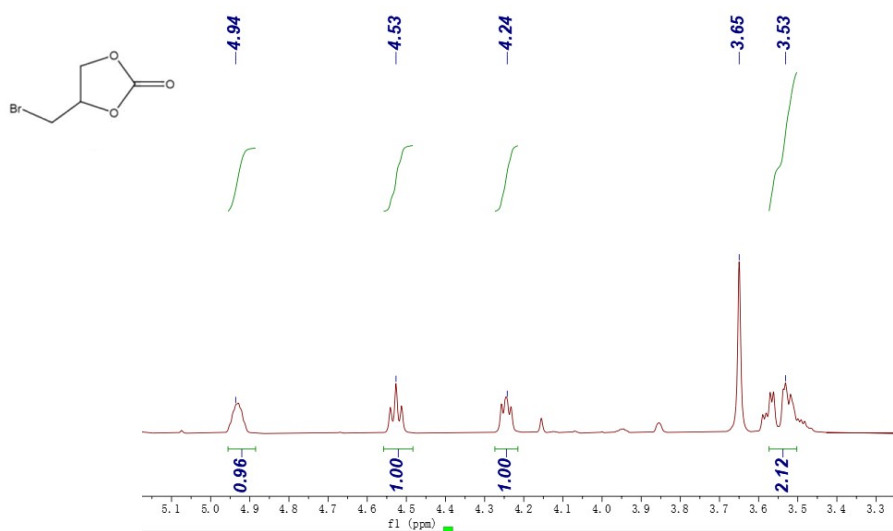

**Figure S11.** The  $^1\text{H}$  NMR spectrum of 4-(bromomethyl)-1,3-dioxolan-2-one ( $\text{CDCl}_3$ ).

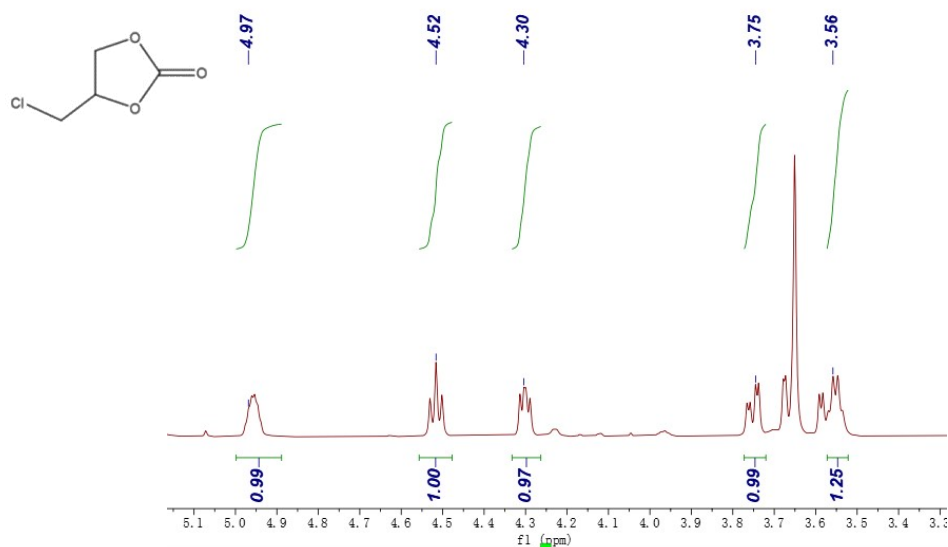

**Figure S12.** The  $^1\text{H}$  NMR spectrum of 4-(chloromethyl)-1,3-dioxolan-2-one ( $\text{CDCl}_3$ ).

**Table S1. Crystal data and structure refinement for PtAg<sub>9</sub>P<sub>8</sub>C<sub>144</sub>H<sub>96</sub>Br<sub>24</sub>Cl<sub>3</sub>.**

|                                            |                                                                                                     |
|--------------------------------------------|-----------------------------------------------------------------------------------------------------|
| <b>Identification code</b>                 | W1-20230303-PtAg-P28_auto                                                                           |
| <b>Formula</b>                             | C <sub>144</sub> H <sub>96</sub> Ag <sub>9</sub> Br <sub>24</sub> Cl <sub>3</sub> P <sub>8</sub> Pt |
| <b>Formula wight</b>                       | 5264.07                                                                                             |
| <b>Temperature/K</b>                       | 100.00(10)                                                                                          |
| <b>Crystal system</b>                      | trigonal                                                                                            |
| <b>Space group</b>                         | R-3                                                                                                 |
| <b>a (Å)</b>                               | 19.1020(3)                                                                                          |
| <b>b (Å)</b>                               | 19.1020(3)                                                                                          |
| <b>c (Å)</b>                               | 90.1075(13)                                                                                         |
| <b>α (°)</b>                               | 90                                                                                                  |
| <b>β (°)</b>                               | 90                                                                                                  |
| <b>γ (°)</b>                               | 120                                                                                                 |
| <b>V (Å<sup>3</sup>)</b>                   | 28474.0(10)                                                                                         |
| <b>Z</b>                                   | 6                                                                                                   |
| <b>D<sub>c</sub> / (g·cm<sup>-3</sup>)</b> | 1.842                                                                                               |
| <b>Radiation</b>                           | Cu Kα (λ=1.54184 Å)                                                                                 |
| <b>Theta (°) range</b>                     | 5.432 to 129.126                                                                                    |
| <b>Index ranges</b>                        | -22 ≤ h ≤ 22, -22 ≤ k ≤ 22, -90 ≤ l ≤ 104                                                           |
| <b>Refls. Total</b>                        | 88547                                                                                               |
| <b>Restraints</b>                          | 95                                                                                                  |
| <b>Parameters</b>                          | 568                                                                                                 |
| <b>R<sub>int</sub></b>                     | 0.0866                                                                                              |
| <b>R1/wR2</b>                              | 0.0398                                                                                              |
| <b>[I&gt;2σ(I)]</b>                        | 0.0945                                                                                              |
| <b>R1/wR2</b>                              | 0.0596                                                                                              |
| <b>(all data)</b>                          | 0.1008                                                                                              |
| <b>Goof</b>                                | 1.076                                                                                               |

---

**Table S2. Selected bond lengths (Å) for cluster PtAg<sub>9</sub>.**

| Parameter | value     | Parameter | value      |
|-----------|-----------|-----------|------------|
| Pt01-Ag02 | 2.6988(4) | Ag02-Ag03 | 2.8519(6)  |
| Pt01-Ag02 | 2.6988(5) | Ag02-Ag03 | 2.8925(6)  |
| Pt01-Ag03 | 2.7497(5) | Ag02-Ag04 | 2.8363(6)  |
| Pt01-Ag03 | 2.7498(5) | Ag02-P00E | 2.4078(17) |
| Pt01-Ag04 | 2.7402(6) | Ag03-Ag04 | 2.8981(7)  |
| Pt01-P00D | 2.283(3)  | Ag03-Ag04 | 2.7985(7)  |

**Table S3. Frontier molecular orbital compositions (%) in the ground state for cluster PtAg<sub>9</sub> at the PBE0/6-31G\* & LANL2DZ level.**

| orbital | Contribution (%) |                 |      |           |
|---------|------------------|-----------------|------|-----------|
|         | Pt               | Ag <sub>9</sub> | Cl   | Phosphine |
| HOMO-1  | 27.23            | 42.34           | 4.21 | 26.21     |
| HOMO    | 12.74            | 60.56           | 9.62 | 17.06     |
|         | 12.74            | 60.56           | 9.62 | 17.06     |
| LUMO    | 10.61            | 56.96           | 1.99 | 30.44     |
| LUMO+1  | 7.34             | 61.14           | 5.63 | 25.87     |
|         | 7.34             | 61.14           | 5.63 | 25.87     |
| LUMO+2  | 1.85             | 42.33           | 2.15 | 53.67     |
